# Supplementary material for: Multiple burr hole and erythropoietin combination therapy: optimal early surgical intervention for patients with acute stroke episode of moyamoya disease or moyamoya syndrome
Source: PubMed Central journal article supplement (PMC11700813; doi:10.3389/fneur.2024.1479379), 2024-12-23
Supplement: Data_Sheet_1.pdf [file Data_Sheet_1.pdf]

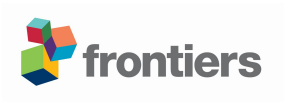

## *Supplementary Material*

**Supplementary Figures and Tables**

**Supplementary Figure 1**

1A: Example of “Impaired” vascularity on lateral DSA view.

1B: Example of “Not impaired” vascularity on lateral DSA view.

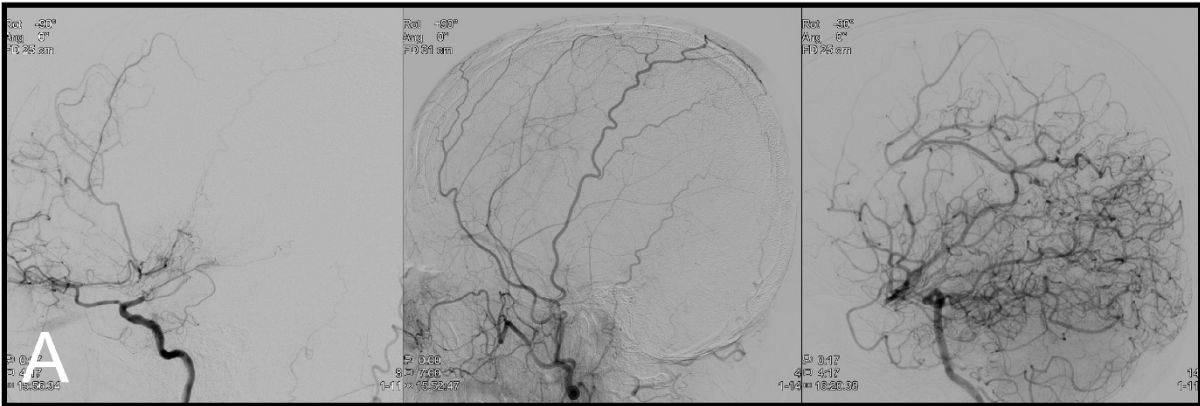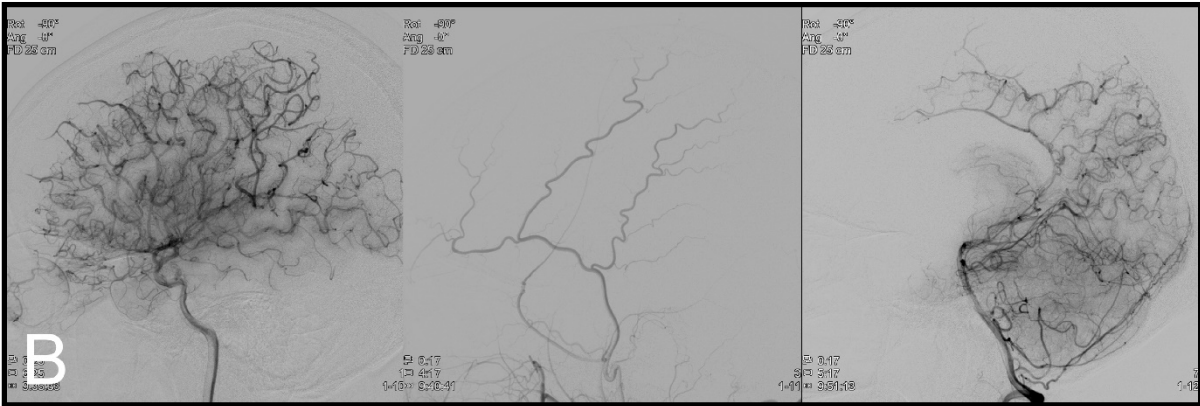

DSA: Digital subtraction angiography

**Supplementary Figure 2:**

*Violin plots for NIHSS scores at different timepoints*

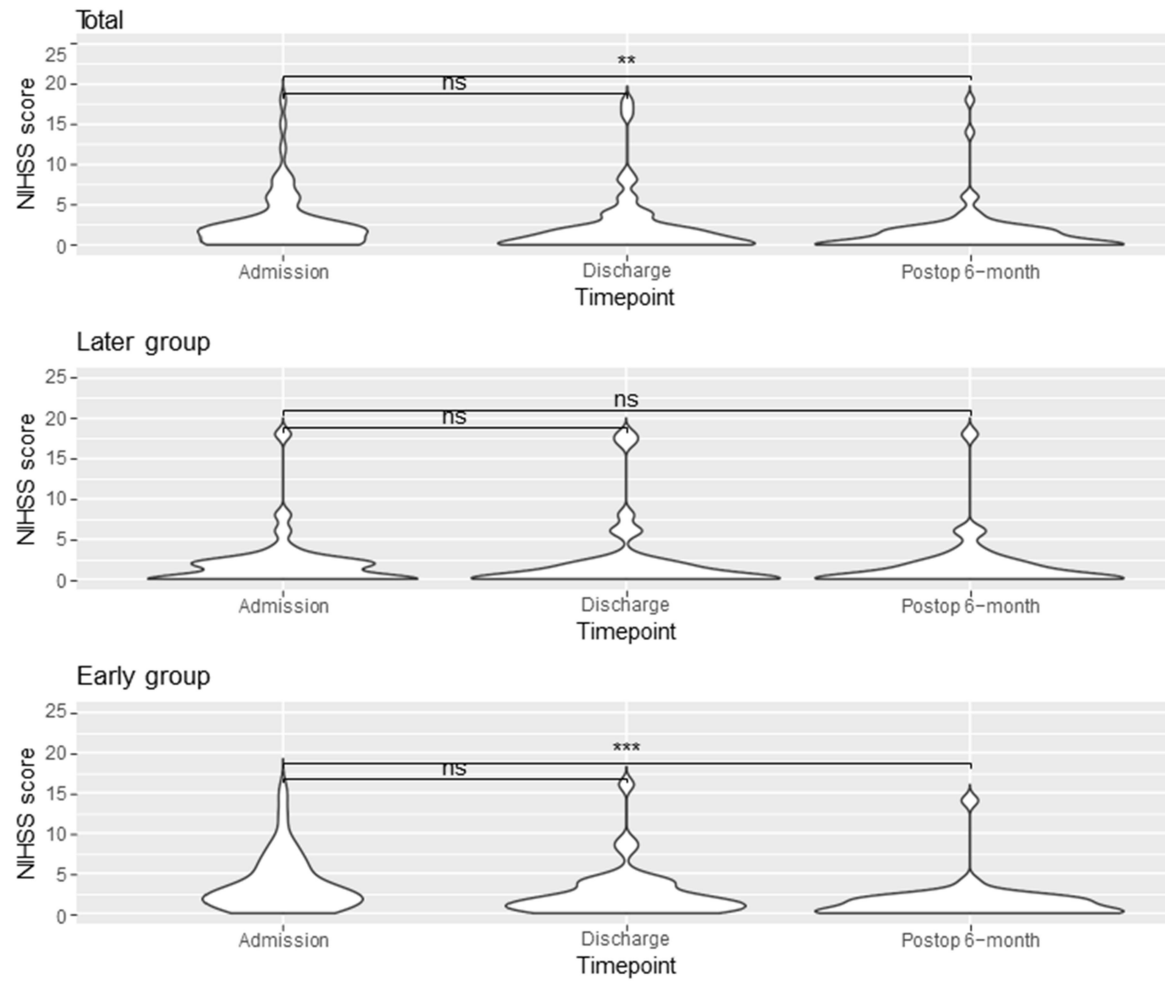

NIHSS: National Institutes of Health Stroke Scale, ns: not statistically significant, \*\*: p-value < 0.01, \*\*\*: p-value < 0.001

### Supplementary Figure 3

*Violin plots for Suzuki stages at different timepoints*

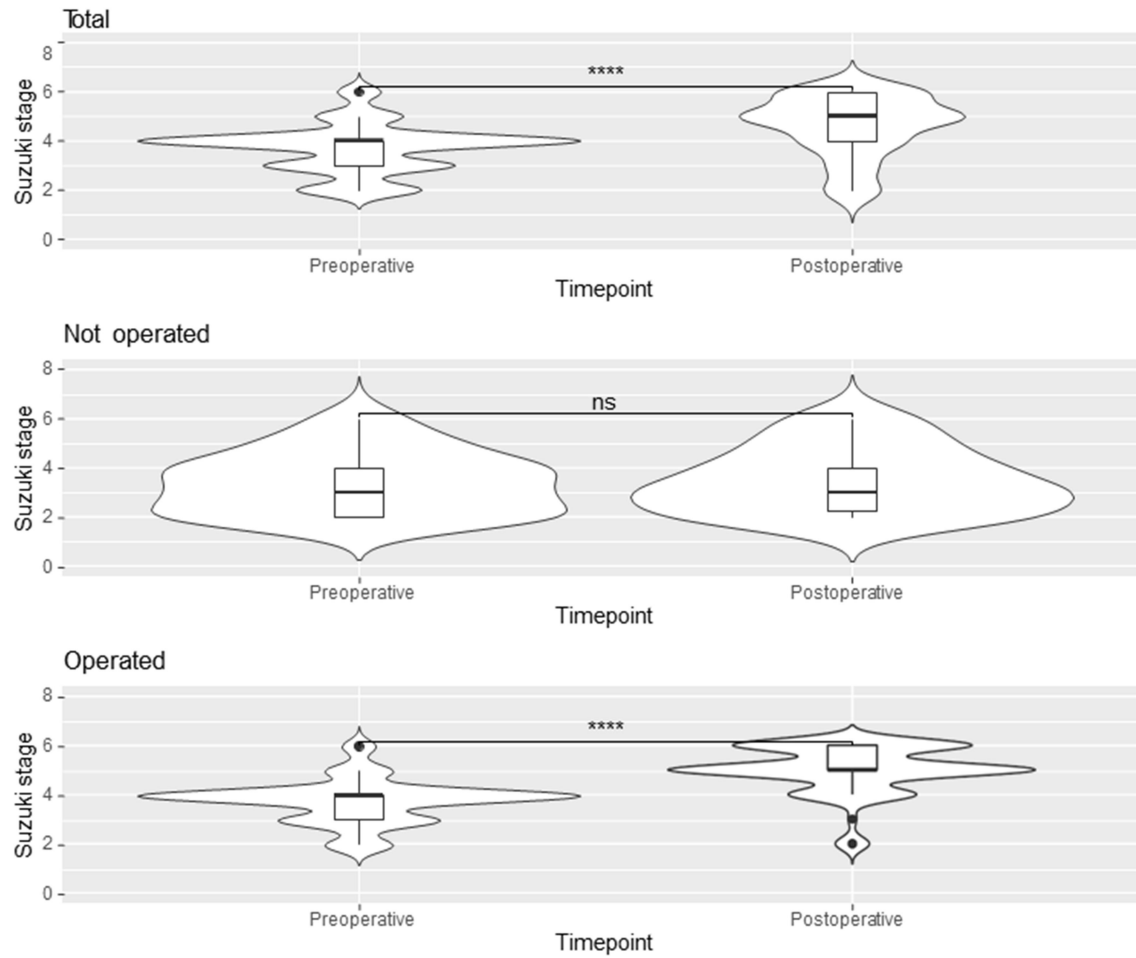

ns: not statistically significant, \*\*: p-value < 0.01, \*\*\*: p-value < 0.001

## Supplementary Table 1

*Clinical details of patients showing fluctuations or progression in the postoperative period*

| Post operative clinical worsening   | Age/sex | Presentation                                                                                | MRI lesion                                    | Pre operative clinical course | Detailed clinical course                                                                                                                                                                                                                                                    | Discharge mRS | 6m mRS |
|-------------------------------------|---------|---------------------------------------------------------------------------------------------|-----------------------------------------------|-------------------------------|-----------------------------------------------------------------------------------------------------------------------------------------------------------------------------------------------------------------------------------------------------------------------------|---------------|--------|
| Lesion extension 1<br>Progression 1 | 52/F    | Right hemiplegia<br>upper and lower G1<br>NIHSS 9                                           | Acute,<br>Lt MCA<br>dotty infarct             | Progression                   | Seven days after the procedure, the patient exhibited mixed transcortical aphasia, and an extension of the lesion was identified at the corpus callosum on MR-DWI. However, this lesion extension showed improvement with flow augmentation therapy.                        | 4             | 2      |
| Lesion extension 2<br>Progression 2 | 42/F    | Clinical TIA<br>Motor weakness, dysarthria<br>within 2 weeks                                | Acute,<br>Lt MCA<br>dotty infarct             | Fluctuation                   | During the first two days after the procedure, the patient experienced transient aphasia, which subsequently showed improvement. Upon routine CT scan before discharge, an extension of the lesion is observed in the left frontoparietal area.                             | 2             | 2      |
| Lesion extension 3<br>Fluctuation 1 | 57/M    | Hemispheric symptoms<br>NIHSS 22                                                            | Acute,<br>Lt MCA<br>Borderzone infarct        | Progression                   | Following the combination therapy, the patient's neurological status showed improvement to an NIHSS score of 14 after 2 days. However, a follow-up CT scan revealed an extension of the hemispheric lesion.                                                                 | 4             | 4      |
| Fluctuation 2                       | 39/F    | Clinical TIA<br>Lt hand hypoesthesia, Headache<br>At admission, no clinical symptoms        | TIA<br>without any parenchymal<br>abnormality | Stable                        | Seven days after the procedure, the patient experienced temporary weakness in the distal upper motor (graded as G4). This weakness was successfully resolved after receiving hydration and dual antiplatelet therapy. Additionally, the MRI did not show any abnormalities. | 1             | 1      |
| Fluctuation 3                       | 61/F    | Aphasia, Right side weakness,<br>one month before admission<br>without clinical aggravation | Lt ACA<br>dotty infarct                       | Stable                        | Five days after the procedure, the patient experienced a brief episode of transient hypoesthesia in her right finger, lasting for approximately 15 minutes. This hypoesthesia resolved on its own without the need for intervention.                                        | 0             | 1      |
| Fluctuation 4                       | 49/F    | IVH treated with EVD,<br>6month before admission.<br>At admission, no clinical symptoms     | No parenchymal<br>abnormality                 | Stable                        | Five days after the procedure, the patient experienced temporary weakness in her left fingers (G4). However, this weakness improved after receiving cilostazol. The MRI did not show any abnormal signals.                                                                  | 1             | 1      |

|                |      |                                                                                                                                        |                                                       |                                                                                                                                                                                              |                                                                                                                                                                                                                                                                                                                                                                                                                                            |   |   |
|----------------|------|----------------------------------------------------------------------------------------------------------------------------------------|-------------------------------------------------------|----------------------------------------------------------------------------------------------------------------------------------------------------------------------------------------------|--------------------------------------------------------------------------------------------------------------------------------------------------------------------------------------------------------------------------------------------------------------------------------------------------------------------------------------------------------------------------------------------------------------------------------------------|---|---|
| Fluctuation 5  | 31/F | Right thalamic ICH c IVH treated with EVD, Stupor mentality at admission                                                               | Not taken                                             | Stable, Mental status was improved                                                                                                                                                           | Four days after the procedure, the patient's mental status declined again to a state of stupor, accompanied by left-sided eyeball deviation. However, her mental status improved after the administration of levetiracetam. The patient's general clinical status improved, leading to successful extubation and successful rehabilitation.                                                                                                | 4 | 3 |
| Fluctuation 6  | 38/F | Clinical TIA<br>Lt leg hypoesthesia<br>No focal neurologic deficit at admission                                                        | No parenchymal abnormality                            | Stable                                                                                                                                                                                       | Six days after the procedure, the patient experienced transient hypoesthesia in the left arm, which resolved on its own. Additionally, CT angiography did not reveal any abnormalities.                                                                                                                                                                                                                                                    | 0 | 0 |
| Fluctuation 7  | 25/F | Clinical TIA<br>Lt hand hypoesthesia, Headache<br>No focal neurologic deficit at admission                                             | White matter signal change, Both internal border zone | Stable                                                                                                                                                                                       | Four days after the procedure, the patient experienced mild hypoesthesia in the left arm and leg. This symptom was resolved after administration of cilostazol.                                                                                                                                                                                                                                                                            | 0 | 0 |
| Fluctuation 8  | 70/F | Lt hemiparesis,<br>Lt homonymous hemianopsia due to infarction,<br>4 years before admission.<br>Disease status was stable at admission | Rt PCA infarct, both basal ganglia<br>dotty infarct   | Stable                                                                                                                                                                                       | Three days after the procedure, the patient developed a fever and became abulic. However, her symptoms showed improvement after receiving fluid augmentation therapy and antipyretic medications.                                                                                                                                                                                                                                          | 5 | 3 |
| Fluctuation 9  | 37/M | Dysarthria<br>NIHSS 1                                                                                                                  | Acute,<br>Lt MCA<br>scattered infarct                 | Progression<br>Right homonymous hemianopsia and<br>Rt hemiparesis (upper, G4)<br>with hypoesthesia was developed,<br>lesion extension was seen at<br>Lt MCA-PCA,<br>watershed area on MR-DWI | Six days after the procedure, the patient developed additional right-sided motor weakness (graded as G4) in the lower extremity. However, this weakness showed improvement with fluid augmentation and induced hypertension therapy. There were no signs of additional acute infarction on MR-DWI. Other symptoms that worsened just before the procedure showed improvement. By the time of discharge, only subtle hypoesthesia remained. | 1 | 1 |
| Fluctuation 10 | 27/F | Clinical TIA<br>Rt hand, leg weakness<br>No focal neurologic deficit admission                                                         | No parenchymal abnormality                            | Stable                                                                                                                                                                                       | Right after the procedure, the patient experienced a focal motor onset seizure that lasted for 30 seconds. Fortunately, the seizure resolved spontaneously.                                                                                                                                                                                                                                                                                | 0 | 0 |
| Fluctuation 11 | 46/F | Clinical TIA                                                                                                                           | Acute,<br>Rt MCA<br>dotty infarct                     | Progression                                                                                                                                                                                  | Immediately after the procedure, the patient reported transient hypoesthesia in the left hand, which resolved on its own. By the time of discharge, t                                                                                                                                                                                                                                                                                      | 2 | 1 |

|                |      |                        |                                                     |                                                         |                                                                                                                                                                                                     |   |   |
|----------------|------|------------------------|-----------------------------------------------------|---------------------------------------------------------|-----------------------------------------------------------------------------------------------------------------------------------------------------------------------------------------------------|---|---|
|                |      | Lt hand motor weakness | Motor weakness reoccured before the procedure       | he motor weakness in the left hand had fully recovered. |                                                                                                                                                                                                     |   |   |
| Fluctuation 12 | 35/F | Cortical TIA symptoms  | Acute,<br>Lt borderzone dotty infarct               | Stable                                                  | Three days post-procedure, the patient encountered tingling in the right hand and distal weakness with a grade of 4. These symptoms resolved within a span of two hours.                            | 0 | 0 |
| Fluctuation 13 | 72/F | Motor weakness NIHSS 0 | Acute,<br>Lt MCA posterior borderzone dotty infarct | Stable                                                  | Two days after receiving combination therapy, the patient presented with distal handgrip weakness (graded as G4). However, this condition was successfully resolved with flow augmentation therapy. | 2 | 0 |

F: Female, M: Male, Lt: Left, Rt: Right G: Motor grade, NIHSS: National Institutes of Health Stroke Scale, TIA: Transient ischemic attack, ACA: Anterior cerebral artery, MCA: Middle cerebral artery, PCA: Posterior cerebral artery, MR-DWI: Diffusion weighted image on Magnetic resonance imaging, CT: Computed tomography, EVD: External ventricular drainage, ICH: Intracerebral hemorrhage, IVH: Intraventricular hemorrhage

## Supplementary Table 2:

### *Logistic regression for factors associated with successful regional neovascularization*

|                                       | Frontal bone           |                 |                        |             | Coronal suture          |                 |                        |             |
|---------------------------------------|------------------------|-----------------|------------------------|-------------|-------------------------|-----------------|------------------------|-------------|
|                                       | Univariate analysis    |                 | Multivariate analysis  |             | Univariate analysis     |                 | Multivariate analysis  |             |
|                                       | OR<br>[95% CI]         | <i>p</i>        | OR<br>[95% CI]         | <i>p</i>    | OR<br>[95% CI]          | <i>p</i>        | OR<br>[95% CI]         | <i>p</i>    |
| Vascularity (DSA)                     |                        |                 |                        |             |                         |                 |                        |             |
| Frontal, n                            |                        |                 |                        |             |                         |                 |                        |             |
| Not impaired                          | ref                    |                 | ref                    |             | ref                     |                 |                        |             |
| Impaired                              | 3.5<br>[1.67 - 7.54]   | <b>&lt;0.01</b> | 1.39<br>[0.29 - 6.97]  | 0.68        | 1.83<br>[0.72 - 4.72]   | 0.21            |                        |             |
| Coronal suture, n                     |                        |                 |                        |             |                         |                 |                        |             |
| Not impaired                          | ref                    |                 |                        |             | ref                     |                 | ref                    |             |
| Impaired                              | 2.42<br>[0.65 - 8.92]  | 0.18            |                        |             | 3.44<br>[1.21 - 10.08]  | <b>0.02</b>     | 5.35<br>[1.11 - 29.35] | <b>0.04</b> |
| Parietal, n                           |                        |                 |                        |             |                         |                 |                        |             |
| Not impaired                          | ref                    |                 |                        |             | ref                     |                 | ref                    |             |
| Impaired                              | 7.56<br>[1.94 - 34.12] | <b>&lt;0.01</b> |                        |             | 6.4<br>[2.12 - 21.27]   | <b>&lt;0.01</b> | 8.05<br>[1.53 - 55.54] | <b>0.02</b> |
| Posterior parietal, n                 |                        |                 |                        |             |                         |                 |                        |             |
| Not impaired                          | ref                    |                 |                        |             | ref                     |                 |                        |             |
| Impaired                              | 0.59<br>[0.10 - 1.89]  | 0.44            |                        |             | 0.72<br>[0.26 - 1.68]   | 0.48            |                        |             |
| Perfusion status<br>(CTP, MRP, SPECT) |                        |                 |                        |             |                         |                 |                        |             |
| ACA, n                                |                        |                 |                        |             |                         |                 |                        |             |
| Without RPI                           | ref                    |                 | ref                    |             | ref                     |                 | ref                    |             |
| RPI<br>without infarction             | 4.09<br>[1.08 - 16.97] | <b>0.04</b>     | 5.72<br>[1.07 - 41.69] | 0.06        | 5.42<br>[1.81 - 17.62]  | <b>&lt;0.01</b> | 6.05<br>[1.38 - 31.31] | <b>0.02</b> |
| RPI<br>with acute infarction          |                        |                 |                        |             |                         |                 |                        |             |
| RPI<br>with chronic infarction        |                        |                 |                        |             | 4.64<br>[0.78 - 38.86]  | 0.11            | 2.76<br>[0.30 - 33.24] | 0.38        |
| MCA, n                                |                        |                 |                        |             |                         |                 |                        |             |
| Without RPI                           | ref                    |                 | ref                    |             | ref                     |                 | ref                    |             |
| RPI<br>without infarction             | 7.43<br>[1.82 - 35.47] | <b>&lt;0.01</b> | 5.33<br>[1.01 - 35.42] | 0.06        | 4.92<br>[1.47 - 18.33]  | <b>0.01</b>     | 6.03<br>[1.21 - 35.21] | <b>0.03</b> |
| RPI<br>with acute infarction          | 14<br>[1.68 - 314.47]  | <b>0.03</b>     | 3.19<br>[0.23 - 85.74] | 0.41        | 12.6<br>[1.60 - 273.73] | <b>0.04</b>     | 2.03<br>[0.15 - 54.05] | 0.61        |
| RPI<br>with chronic infarction        | 2<br>[0.07 - 60.50]    | 0.65            | 2.01<br>[0.06 - 71.58] | 0.67        | 0.9<br>[0.04 - 11.95]   | 0.94            | 2.37<br>[0.06 - 75.92] | 0.62        |
| PCA, n                                |                        |                 |                        |             |                         |                 |                        |             |
| Without RPI                           | ref                    |                 |                        |             | ref                     |                 |                        |             |
| RPI<br>without infarction             | 1.17<br>[0.28 - 6.05]  | 0.84            |                        |             | 2.51<br>[0.70 - 11.94]  | 0.19            |                        |             |
| RPI<br>with acute infarction          |                        |                 |                        |             | 3.14<br>[0.47 - 62.34]  | 0.31            |                        |             |
| RPI<br>with chronic infarction        |                        |                 |                        |             | 1.26<br>[0.11 - 28.00]  | 0.86            |                        |             |
| Timing of surgery, n                  |                        |                 |                        |             |                         |                 |                        |             |
| Later group                           | ref                    |                 | ref                    |             | ref                     |                 | ref                    |             |
| Early group                           | 5.57<br>[1.62 - 22.95] | <b>&lt;0.01</b> | 6.22<br>[1.27 - 40.40] | <b>0.03</b> | 4.04<br>[1.54 - 11.41]  | <b>&lt;0.01</b> | 5.82<br>[1.40 - 30.26] | <b>0.02</b> |



|                                       | Parietal bone          |                  |                         |                 | Posterior parietal bone |             |                        |             |
|---------------------------------------|------------------------|------------------|-------------------------|-----------------|-------------------------|-------------|------------------------|-------------|
|                                       | Univariate analysis    |                  | Multivariate analysis   |                 | Univariate analysis     |             | Multivariate analysis  |             |
|                                       | OR<br>[95% CI]         | <i>p</i>         | OR<br>[95% CI]          | <i>p</i>        | OR<br>[95% CI]          | <i>p</i>    | OR<br>[95% CI]         | <i>p</i>    |
| Vascularity (DSA)                     |                        |                  |                         |                 |                         |             |                        |             |
| Frontal, n                            |                        |                  |                         |                 |                         |             |                        |             |
| Not impaired                          | ref                    |                  |                         |                 | ref                     |             |                        |             |
| Impaired                              | 1.62<br>[0.62 - 4.24]  | 0.33             |                         |                 | 1.8<br>[0.38 - 9.12]    | 0.46        |                        |             |
| Coronal suture, n                     |                        |                  |                         |                 |                         |             |                        |             |
| Not impaired                          | ref                    |                  | ref                     |                 | ref                     |             |                        |             |
| Impaired                              | 5.54<br>[1.96 - 16.59] | <b>&lt;0.01</b>  | 6.44<br>[1.65 - 29.07]  | <b>&lt;0.01</b> | 5.14<br>[0.93 - 41.95]  | <b>0.08</b> |                        |             |
| Parietal, n                           |                        |                  |                         |                 |                         |             |                        |             |
| Not impaired                          | ref                    |                  | ref                     |                 | ref                     |             |                        |             |
| Impaired                              | 7.86<br>[2.44 - 28.64] | <b>&lt;0.001</b> | 5.93<br>[1.31 - 31.29]  | <b>0.03</b>     | 2.25<br>[0.38 - 18.57]  | 0.4         | 1.65<br>[0.24 - 14.76] | 0.62        |
| Posterior parietal, n                 |                        |                  |                         |                 |                         |             |                        |             |
| Not impaired                          | ref                    |                  |                         |                 | ref                     |             |                        |             |
| Impaired                              | 0.58<br>[0.18 - 1.42]  | 0.28             |                         |                 | 0.21<br>[0.03 - 0.90]   | <b>0.07</b> | 0.2<br>[0.03 - 0.98]   | <b>0.08</b> |
| Perfusion status<br>(CTP, MRP, SPECT) |                        |                  |                         |                 |                         |             |                        |             |
| ACA, n                                |                        |                  |                         |                 |                         |             |                        |             |
| Without RPI                           | ref                    |                  |                         |                 | ref                     |             |                        |             |
| RPI<br>without infarction             | 7.2<br>[2.37 - 23.97]  | <b>&lt;0.001</b> |                         |                 | 2.62<br>[0.43 - 22.15]  | 0.32        |                        |             |
| RPI<br>with acute infarction          |                        |                  |                         |                 |                         |             |                        |             |
| RPI<br>with chronic infarction        | 16<br>[2.29 - 329.08]  | <b>0.02</b>      |                         |                 |                         |             |                        |             |
| MCA, n                                |                        |                  |                         |                 |                         |             |                        |             |
| Without RPI                           | ref                    |                  | ref                     |                 |                         |             |                        |             |
| RPI<br>without infarction             | 3.76<br>[1.05 - 14.40] | <b>0.04</b>      | 5.24<br>[1.17 - 25.99]  | <b>0.03</b>     |                         |             |                        |             |
| RPI<br>with acute infarction          | 8.4<br>[1.00 - 186.94] | <b>0.08</b>      | 2.94<br>[0.24 - 75.92]  | 0.43            |                         |             |                        |             |
| RPI<br>with chronic infarction        | 1.4<br>[0.05 - 41.55]  | 0.83             | 3.35<br>[0.09 - 148.36] | 0.49            |                         |             |                        |             |
| PCA, n                                |                        |                  |                         |                 |                         |             |                        |             |
| Without RPI                           | ref                    |                  |                         |                 | ref                     |             |                        |             |
| RPI<br>without infarction             | 1.45<br>[0.43 - 5.80]  | 0.57             |                         |                 | 1.35<br>[0.20 - 8.86]   | 0.75        |                        |             |
| RPI<br>with acute infarction          | 2.64<br>[0.39 - 52.50] | 0.39             |                         |                 | 6.75<br>[0.64 - 162.80] | 0.14        |                        |             |
| RPI<br>with chronic infarction        | 1.58<br>[0.19 - 33.22] | 0.7              |                         |                 |                         |             |                        |             |
| Timing of surgery, n                  |                        |                  |                         |                 |                         |             |                        |             |
| Later group                           | ref                    |                  | ref                     |                 | ref                     |             |                        |             |
| Early group                           | 4.16<br>[1.54 - 12.31] | <b>&lt;0.01</b>  | 5.6<br>[1.56 - 24.86]   | <b>0.01</b>     | 0.6<br>[0.12 - 3.00]    | 0.53        |                        |             |

DSA: Digital subtraction angiography, CTP: CT perfusion, MRP: MR perfusion, SPECT: Single-photon emission computed tomography, ACA: Anterior cerebral artery, MCA: Middle cerebral artery, PCA: Posterior cerebral artery, RPI: Regional perfusion impairment, OR: Odds ratio, CI: Confidence interval, *p*: p-value
